# Supplementary material for: multiSero: open multiplex-ELISA platform for analyzing antibody responses to SARS-CoV-2 infection
Source: PubMed Central journal article supplement (PMC8132273; doi:10.1101/2021.05.07.21249238), 2021-05-11
Supplement: NIHPP2021.05.07.21249238V1-supplement-1.pdf [file NIHPP2021.05.07.21249238V1-supplement-1.pdf]

495 **Supplementary Figures**

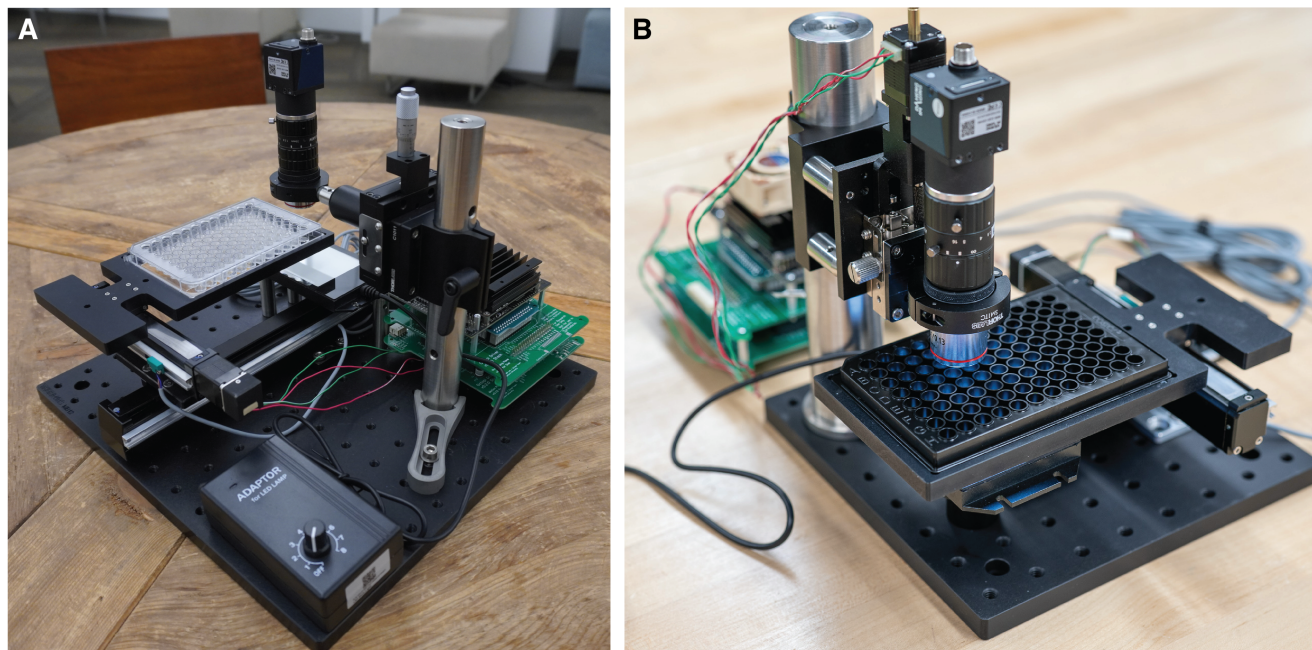

**Fig. S1. Photos of Squid plate reader (Nautilus).** (A) Photo of the original unit used for data collection. (B) Photo of the current version that has motorized focus adjustment.

496

## Tables

| #                                                                    | Description                                                   | Vendor                | Part Number / File for CNC machining                                        | Qty | Unit Price   | Image Reference                                                                       |  |
|----------------------------------------------------------------------|---------------------------------------------------------------|-----------------------|-----------------------------------------------------------------------------|-----|--------------|---------------------------------------------------------------------------------------|--|
| <b>Motorized Focus Assembly</b>                                      |                                                               |                       |                                                                             |     |              |                                                                                       |  |
| 1                                                                    | ball bearing linear stage, stainless steel, ±6.5mm            | <a href="#">dg-sl</a> | LBX40-C ( <a href="#">product page</a> )                                    | 1   | \$61.14      | 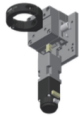   |  |
| 2                                                                    | adapter for mounting SM1TC to LBX40-C                         | XTJ-tech              | <a href="#">adapter_LBX40_SM1TC(thick)_v2.zip</a>                           | 1   | \$25.00      |                                                                                       |  |
| 3                                                                    | adapter for mounting LBX40-C to C1511                         | XTJ-tech              | <a href="#">adapter_LBX40_C1511_v3.zip</a>                                  | 1   | \$25.00      |                                                                                       |  |
| 4                                                                    | adapter for mounting 21H4U to LBX40-C                         | XTJ-tech              | <a href="#">adapter_LBX40_21H4U_v3.stp</a>                                  | 1   | \$55.00      |                                                                                       |  |
| 5                                                                    | size 8 captive linear actuator, 6e-5 in/step                  | Haydon kerk           | 21H4U-2.5-A98 v1 (based on <a href="#">21H4U-2.5-907</a> )                  | 1   | \$130.45     |                                                                                       |  |
| 7                                                                    | Clamp for SM1 Lens Tubes                                      | Thorlabs              | SM1TC                                                                       | 1   | \$45.72      |                                                                                       |  |
| 8                                                                    | SM1 Lens Tube, 0.3" threaded depth                            | Thorlabs              | SM1L03                                                                      | 1   | \$12.52      |                                                                                       |  |
| 9                                                                    | SM1 adapter for Objectives with RMS thread (Olympus,          | Thorlabs              | SM1A3                                                                       | 1   | \$18.50      |                                                                                       |  |
| 11                                                                   | M3 x 15 mm (or 14 mm) socket head screws for mounting         | McMaster-Carr         | 91292A346 or 91292A027                                                      | 4   |              |                                                                                       |  |
| 12                                                                   | M3 x 5 mm socket head screws for mounting the LBX40           | McMaster-Carr         | 91292A110                                                                   | 4   |              |                                                                                       |  |
| 13                                                                   | 8-32 x 1/2" socket head screws for mounting the assem         | McMaster-Carr         | 92196A194                                                                   | 4   |              |                                                                                       |  |
| 14                                                                   | 8-32 x 1/4" socket head screws for mounting SM1TC             | McMaster-Carr         | 92196A190                                                                   | 1   |              |                                                                                       |  |
| 15                                                                   | M2.5 x 8 mm socket head screws for adapter mounting           | McMaster-Carr         | 91292A012                                                                   | 2   |              |                                                                                       |  |
| 16                                                                   | M2 x 6 mm socket head screws for mounting the linear actuator |                       |                                                                             | 4   |              |                                                                                       |  |
| <b>Total: \$312.19</b>                                               |                                                               |                       |                                                                             |     |              |                                                                                       |  |
| <b>"Microscope Body" (may be replaced by custom machined blocks)</b> |                                                               |                       |                                                                             |     |              |                                                                                       |  |
| 1                                                                    | Ø1.5" Post Mounting Clamp, 2.50" x 2.50"                      | Thorlabs              | C1511                                                                       | 1   | \$71.57      |   |  |
| 2                                                                    | Ø1.5" Mounting Post, 1/4"-20 Taps, L = 8" (other length       | Thorlabs              | P8                                                                          | 1   | \$59.79      |                                                                                       |  |
| 3                                                                    | Studded Pedestal Base Adapter, 1/4"-20 Thread                 | Thorlabs              | PB4                                                                         | 1   | \$13.74      |                                                                                       |  |
| 4                                                                    | Clamping Fork for Ø1.5" Pedestal Post or Post Pedesta         | Thorlabs              | PF175B                                                                      | 1   | \$17.00      |                                                                                       |  |
| 5                                                                    | Aluminum Breadboard 6" x 6" x 1/2", 1/4"-20 Taps (othe        | Thorlabs              | MB6                                                                         | 1   | \$51.48      |                                                                                       |  |
| 6                                                                    | Ø18.0 mm Sorbothane Feet, Adhesive Mounting Surfac            | Thorlabs              | AV3                                                                         | 1   | \$19.91      |                                                                                       |  |
| 7                                                                    | 1/4-20 socket head screw and washer                           |                       |                                                                             | 1   |              |                                                                                       |  |
| <b>Total: \$233.49</b>                                               |                                                               |                       |                                                                             |     |              |                                                                                       |  |
| <b>Imaging Lens and Camera Assembly</b>                              |                                                               |                       |                                                                             |     |              |                                                                                       |  |
| 1                                                                    | USB3 camera, Sony IMX 226, 1.85 um, 12 MP, 32 fps             | Daheng                | MER-1220-32U3M                                                              | 1   | \$260.00     |  |  |
| 3                                                                    | f = 50 mm machine vision lens (1/1.8", f2.4, 10 MP rate       | HIKROBOT              | MVL-HF5024M-10MP ( <a href="#">distributor link</a> , <a href="#">MTF</a> ) | 1   | \$136.00     |                                                                                       |  |
| 5                                                                    | M27 ext - SM1 int adapter for MVL-HF5024M-10MP                | Thorlabs              | SM1A35                                                                      | 1   | \$21.86      |                                                                                       |  |
| <b>Total: \$417.86</b>                                               |                                                               |                       |                                                                             |     |              |                                                                                       |  |
| <b>Alternative 140 mm x (up to) 140 mm stage</b>                     |                                                               |                       |                                                                             |     |              |                                                                                       |  |
| 1                                                                    | motorized translation stage, 80 mm travel                     | Kgg-robot             | SSMD20-R02-080L (being replaced by alternative from Kgg-robot o             | 1   | \$150-800, c |  |  |
| 2                                                                    | motorized translation stage, 140 mm travel                    | Kgg-robot             | MVD30-RE18-200L (being replaced by alternative from Kgg-robot o             | 1   | \$150-800, c |                                                                                       |  |
| 6                                                                    | well plate holder (MIC-6 Al)                                  | XTJ-tech              | (being revised)                                                             | 1   | \$80.00      |                                                                                       |  |
| 7                                                                    | well plate format glass slide holder (4 slots)                | XTJ-tech              | (being revised)                                                             | 0   | \$18.00      |                                                                                       |  |
| <b>Total: \$400-\$1000, depending on options</b>                     |                                                               |                       |                                                                             |     |              |                                                                                       |  |
| <b>LED matrix illuminator</b>                                        |                                                               |                       |                                                                             |     |              |                                                                                       |  |
| 1                                                                    | APA102-2020 8x8 RGB LED Grid                                  | Adafruit              | 3444 ( <i>to be replaced with custom made board</i> )                       | 1   | \$24.95      |  |  |
| 2                                                                    | Cage Plate, for mounting the LED matrix                       | Thorlabs              | CP37                                                                        | 1   | \$19.91      |                                                                                       |  |
| 3                                                                    | Cage Plate, for condenser                                     | Thorlabs              | CP33                                                                        | 1   | \$16.89      |                                                                                       |  |
| 4                                                                    | Aspheric Condenser Lens w/ Diffuser, Ø25 mm, f=20.1           | Thorlabs              | ACL2520U-DG6-A                                                              | 1   | \$30.84      |                                                                                       |  |
| 5                                                                    | Cage Rods 1" (pack of 4), for connecting the assembly         | Thorlabs              | ER1-P4                                                                      | 1   | \$19.77      |                                                                                       |  |
| <b>Total: \$112.36</b>                                               |                                                               |                       |                                                                             |     |              |                                                                                       |  |
| <b>Objective</b>                                                     |                                                               |                       |                                                                             |     |              |                                                                                       |  |
| 1                                                                    | 4x/0.13 (0.17 coverslip correction) Plan Fluor WD 16.3m       | Boli Optics           | FM13013231                                                                  | 1   | \$88.98      |                                                                                       |  |
| <b>Filter</b>                                                        |                                                               |                       |                                                                             |     |              |                                                                                       |  |
| 1                                                                    | 655 nm/40 nm band pass filter                                 | Semrock               | FF02-655/40-25                                                              | 0   | \$345.00     |                                                                                       |  |
|                                                                      | 655 nm/30 nm band pass filter                                 | Chroma                | AT655/30m                                                                   | 1   | \$200.00     |                                                                                       |  |
| <b>Total (without motorized XY stage): \$1426.02</b>                 |                                                               |                       |                                                                             |     |              |                                                                                       |  |

Table S1. Nautilus Bill of Materials

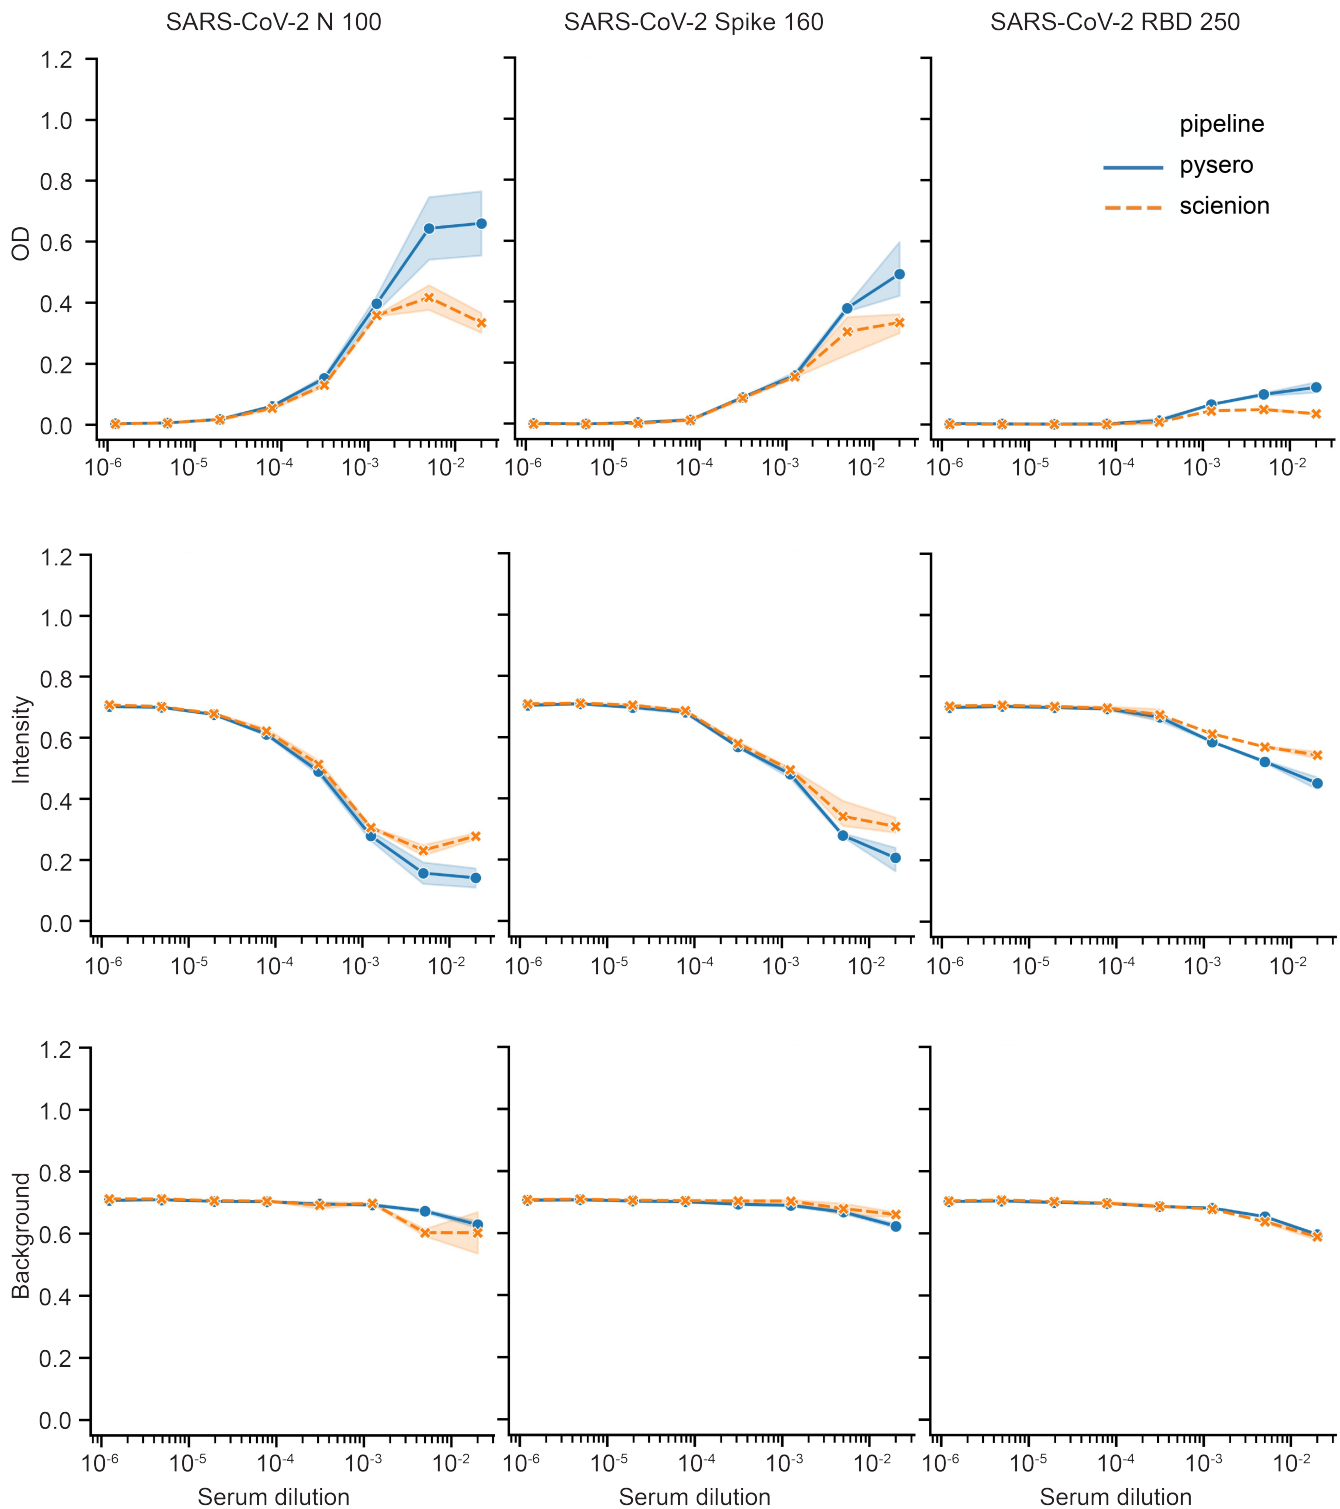

**Fig. S2. Comparison of Scienion analysis platform and pysero.** Images from a SciREADER CL2 were analyzed using either pysero (blue line) or Scienion analysis platform (orange dashed line). Analyzed OD (top), intensity (middle), and background intensity (bottom) for antibody responses of a single SARS-CoV-2 positive serum to three antigens (left to right: SARS-CoV-2 N, Spike, RBD) are shown as a function of serum dilution. Shades around lines represent 95% confidence intervals around the mean of triplicate spots.

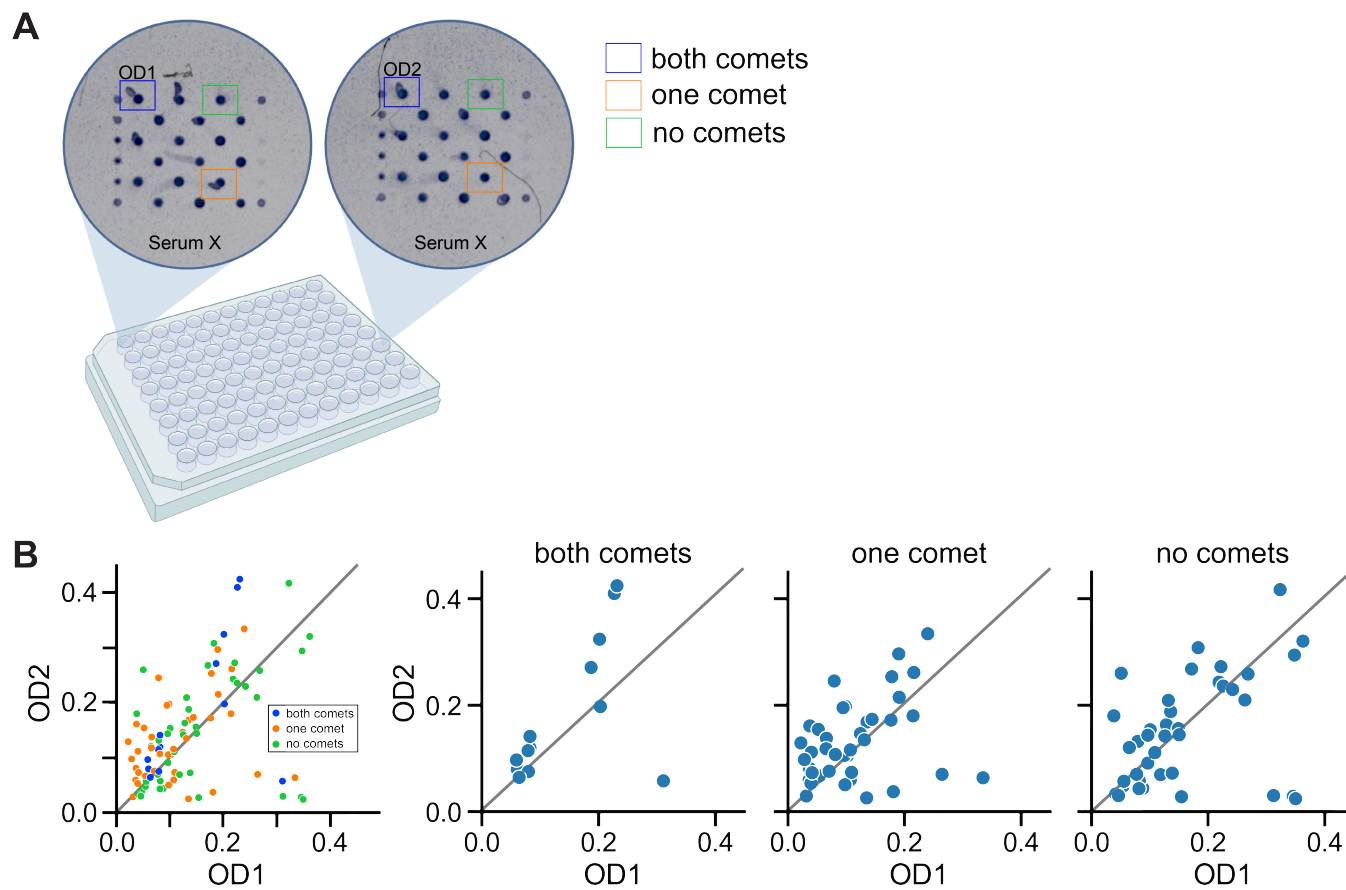

**Fig. S3. Evaluation of how comets affect measured ODs using duplicate ELISA-array wells.** ODs from spots at the same locations in the array grid were compared across duplicate wells. **(A)** Schematic of example spot-spot comparison. Top-left non-fiducial spot in well A1 containing serum X was compared to the top-left non-fiducial spot in well F12 also containing serum X. **(B)** The data for one plate of duplicate sera are split according to the number of comets in the spot pairs: spot pairs in which one spot had a comet (orange); spot pairs in which both spots had comets (blue); and spot pairs in which neither spot had a comet (green). A  $y = x$  line is denoted on the plot (grey line). We find that the presence of comets does not add observable bias or variance to OD measurements.

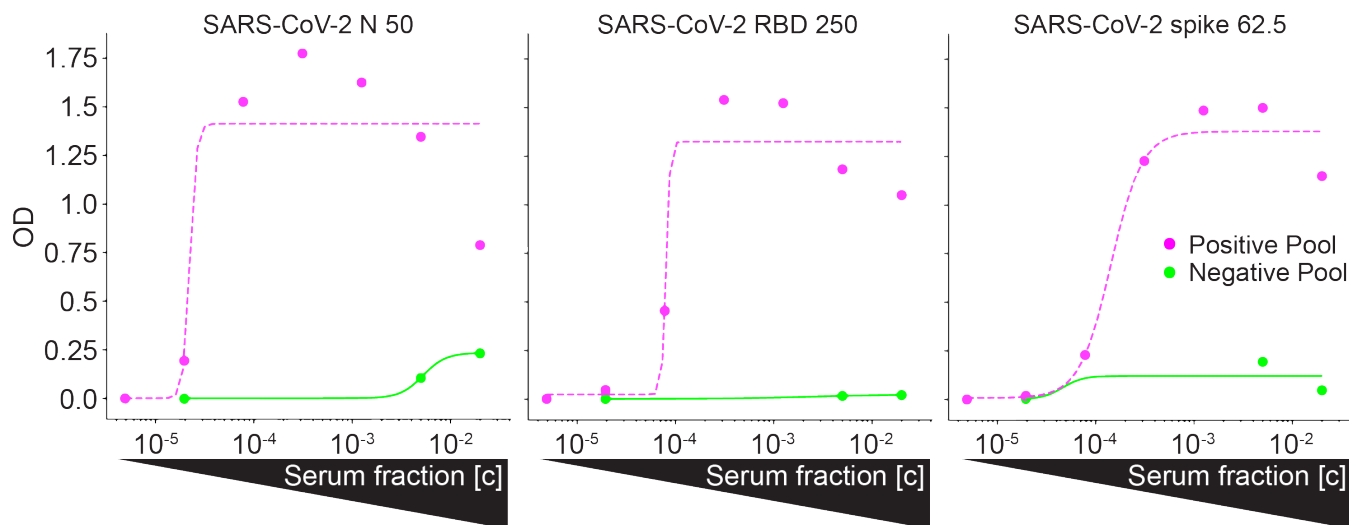

**Fig. S4. Reactivity of Positive Pool and Negative Pool.** After OD extraction from the registered grid coordinates, pysero generates plots according to user-specified parameters. Representative plots of antibody responses against the 3 SARS-CoV-2 antigens in the array: N (left), RBD (center), and spike (right). Positive Pool indicates pooled sera from SARS-CoV-2 RT-PCR-positive individuals (magenta points) and Negative Pool indicates pooled sera from individuals prior to the pandemic (green points). The respective curves are 4 parameter logistic regressions fit to OD values of a serial dilutions of the sera, with diminished OD values at highest concentrations likely due to the 'hook effect' (8). Pysero can output curve fits (shown above), categorical plots, and receiver operating characteristic analysis.

| Antigen    | AUC   | TPR 95% Specificity | TPR 99% Specificity | Mean +- sd OD of Neg Pool | Mean +- sd [Ab] of Neg Pool |
|------------|-------|---------------------|---------------------|---------------------------|-----------------------------|
| N 50       | 0.969 | 0.907 (0.816-0.939) | 0.638 (0.398-0.826) | 0.1047 ± 0.02238          | 0.0011 ± 0.00055            |
| N 100      | 0.968 | 0.907 (0.822-0.943) | 0.541 (0.238-0.834) | 0.1087 ± 0.02432          | 0.0079 ± 0.00036            |
| RBD 250    | 0.983 | 0.977 (0.957-0.992) | 0.977 (0.936-0.992) | 0.0160 ± 0.01834          | 0.0004 ± 0.00025            |
| RBD 500    | 0.982 | 0.977 (0.957-0.992) | 0.977 (0.957-0.992) | 0.0230 ± 0.00735          | *                           |
| Spike 62.5 | 0.994 | 0.988 (0.973-1)     | 0.984 (0.905-0.994) | 0.1933 ± 0.04399          | 0.0134 ± 0.00266            |
| Spike 125  | 0.989 | 0.984 (0.969-0.996) | 0.981 (0.897-0.992) | 0.0927 ± 0.01977          | *                           |

**Table S2. Summary statistics for antigens in ELISA-array.** Area under the curve (AUC), sensitivity (true positive rate; TPR) at 95% and 99% specificity (N=507), mean OD and mean binding of Negative Pool expressed as relative concentration of mAb CR3022 standard curve in Negative Pool ([Ab] of Neg Pool; units are  $\mu\text{g mL}^{-1}$ ) for each antigen. Asterisks in the relative antibody concentration of Negative Pool column indicate that the mean OD of the Negative Pool for these antigens was lower than the lowest mAb CR3022 concentration in the standard curve.

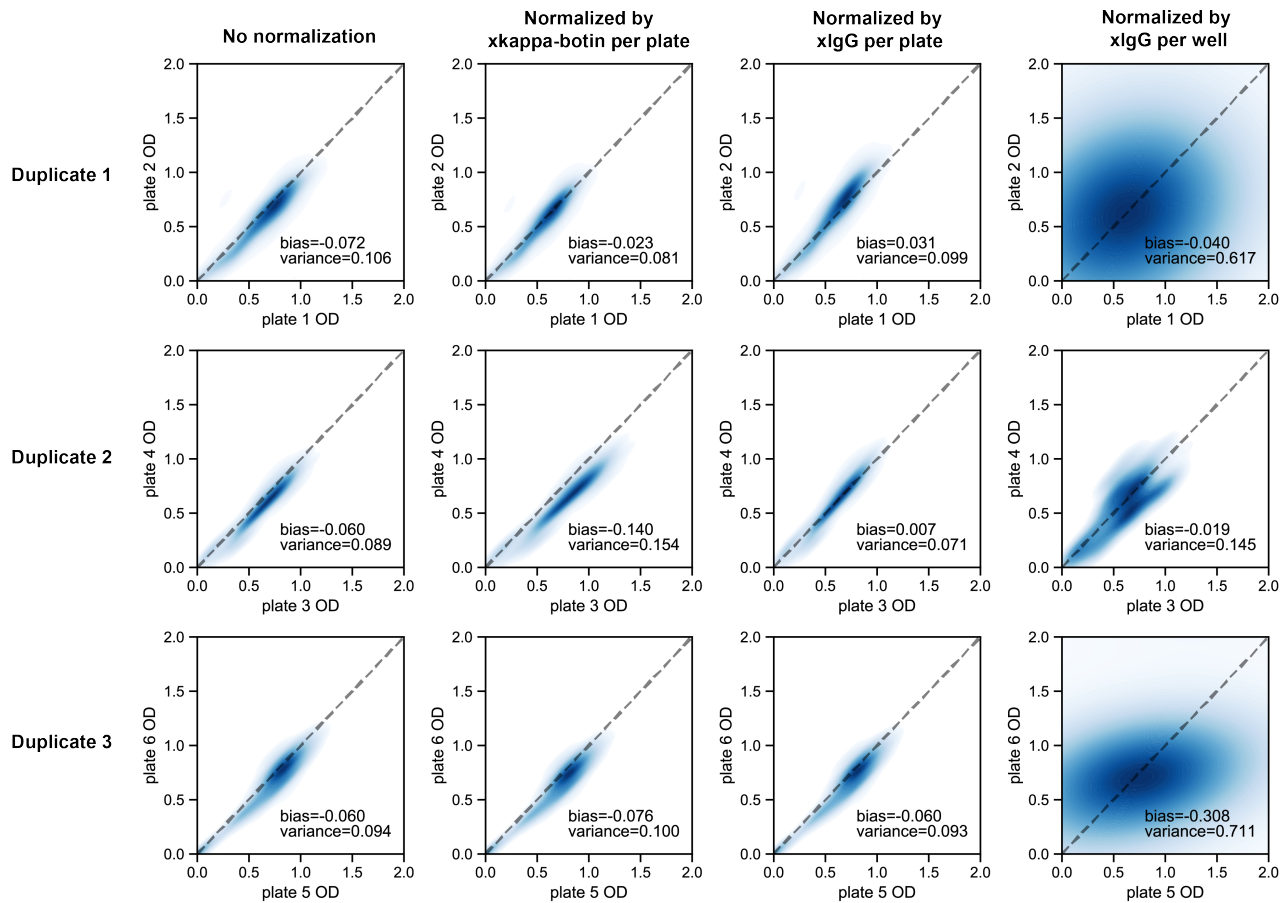

**Fig. S5. Comparison of normalization methods for correcting biases and variances in ODs across plates.** 2D distribution of duplicate OD values of antibody responses of RT-PCR positive sera to SARS-CoV-2 antigens. Spots with the same array location on duplicate plates are plotted against each other and then smoothed by the kernel-density function to show the density of the data points (indicated by the brightness of the blue color, high brightness indicates low density). The spot OD values were normalized by dividing the mean of the reference spot ODs (anti-IgG Fc or fiducial spot) over each plate or well as indicated at the top. Duplicates with identical spot OD values will follow the function  $y = x$  (dashed line). Performance of different normalization schemes are quantified by bias and variance of the normalized OD values across plates, which are defined by mean of  $y - x$  and  $|y - x|$ . 3 duplicates (6 plates) are shown. Normalizing ODs by the mean of anti-IgG Fc ODs over each plate consistently reduces bias and variance in all 3 duplicates.

## A SciREADER CL2

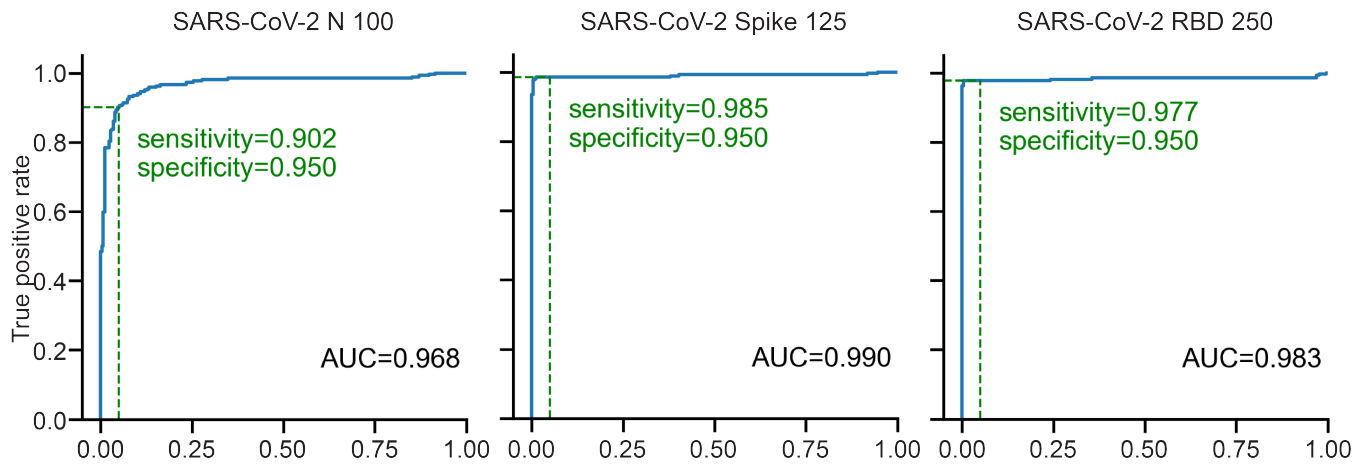

## B Nautilus

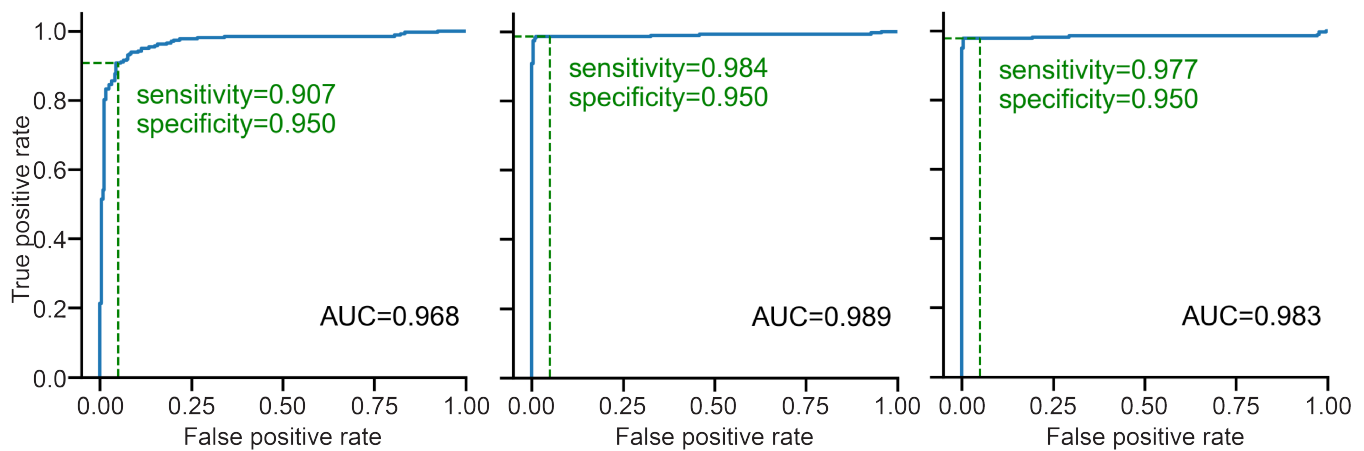

**Fig. S6. Classification accuracy for images acquired with SciREADER CL2 and Nautilus, and analyzed with pysero.** (A-B) ROC curves for single antigens (left to right: SARS-CoV-2 N, Spike, RBD) for array images acquired using SciREADER CL2 (top) or Nautilus (bottom). Images from each platform were analyzed using pysero. Blue shades represent 95% confidence intervals of ROC curves (blue line). For each antigen, the sensitivity (True positive rate) at 95% specificity (1 - false positive rate) is denoted (green dashed line) on the curve. 95% confidence interval of area under the curve (AUC) is reported below each curve (N=507).
